# Supplementary material
Source: MDPI journal article supplement (https://www.mdpi.com/2073-4344/11/9/1117)
Supplement: s1 [file s1 › catalysts-1377510-supplementary.pdf]

# Well-Dispersed $\text{MgAl}_2\text{O}_4$ Supported Ni Catalyst with Enhanced Catalytic Performance and the Reason of Its Deactivation for Long-Term Dry Methanation Reaction

Fen Wang <sup>1,2,\*</sup>, Xiumiao Yang <sup>3,†</sup> and Jingcai Zhang <sup>2</sup>

<sup>1</sup> School of Chemical Engineering, Anhui University of Science and Technology, Huainan 232001, China

<sup>2</sup> Dalian Institute of Chemical Physics, Chinese Academy of Sciences, Dalian 116023, China; zjc@dicp.ac.cn

<sup>3</sup> School of Mechanical Engineering, Anhui University of Science and Technology, Huainan 232001, China; xmyang@aust.edu.cn

\* Correspondence: fenwang@aust.edu.cn; Tel.: +86-13779961290

† These authors contributed equally to this work.

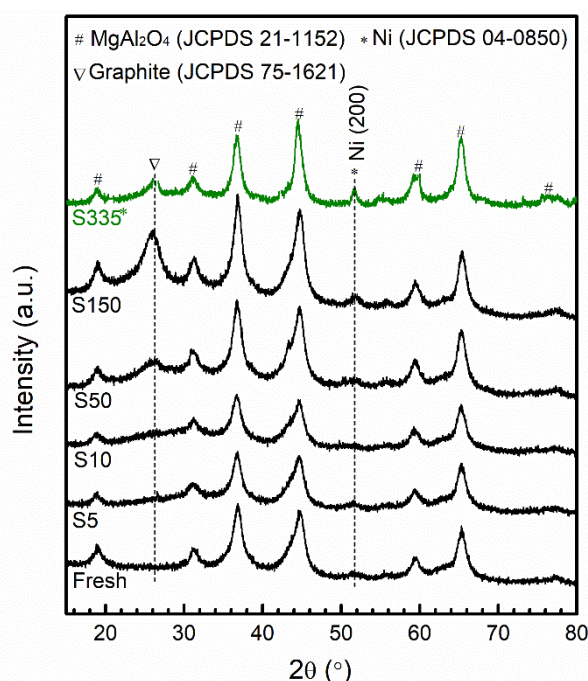

**Figure S1.** XRD patterns for the spent Ni/MgAl<sub>2</sub>O<sub>4</sub>-E catalysts.

**Table S1.** CO conversions, product selectivities and carbon balances for dry methanation reaction over Ni/MgAl<sub>2</sub>O<sub>4</sub>-E catalyst at different temperatures with GHSV of 10,000 mL h<sup>-1</sup> g<sub>cat</sub><sup>-1</sup>.

| Temperature (°C) | X <sub>CO</sub> (%) | S <sub>CH<sub>4</sub></sub> (%) | S <sub>CO<sub>2</sub></sub> (%) | C <sub>balance</sub> (%) |
|------------------|---------------------|---------------------------------|---------------------------------|--------------------------|
| 350              | 51.5                | 61.9                            | 33.8                            | 97.7                     |
| 400              | 91.6                | 49.6                            | 46.6                            | 96.5                     |
| 450              | 89.6                | 50.0                            | 46.9                            | 97.3                     |
| 500              | 82.0                | 49.8                            | 46.3                            | 96.8                     |
| 550              | 70.4                | 48.3                            | 44.7                            | 95.1                     |

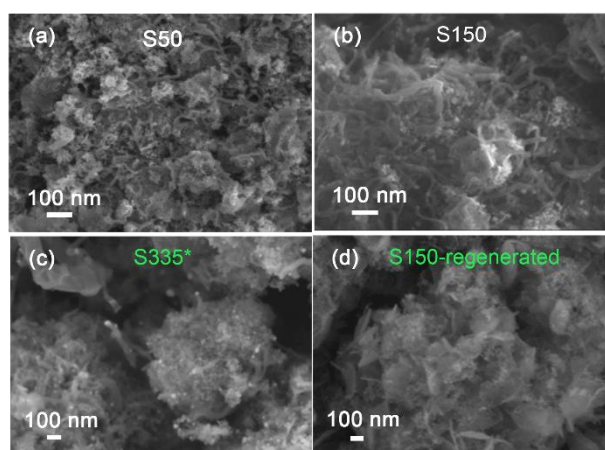

**Figure S2.** SEM images for the spent Ni/MgAl<sub>2</sub>O<sub>4</sub>-E catalysts: (a) Ni/MgAl<sub>2</sub>O<sub>4</sub>-S50, (b) Ni/MgAl<sub>2</sub>O<sub>4</sub>-S150, (c) Ni/MgAl<sub>2</sub>O<sub>4</sub>-S335\* and (d) after reaction for 150 h followed by regeneration.

**Table S2.** Metallic Ni content, metallic Ni and graphitic carbon crystallite size and weight loss during TG of Ni/MgAl<sub>2</sub>O<sub>4</sub>-E catalyst after different reaction time.

| Sample                                     | Ni content (wt.%) | $d_{\text{Ni}}$ (200) (nm) | $d_{\text{Graphite}}$ (002) (nm) | Weight losses* (%) |
|--------------------------------------------|-------------------|----------------------------|----------------------------------|--------------------|
| Fresh                                      | 5.0               | 5.6                        | -                                | -                  |
| Ni/MgAl <sub>2</sub> O <sub>4</sub> -S5    | 4.9               | 5.8                        | -                                | 4.5                |
| Ni/MgAl <sub>2</sub> O <sub>4</sub> -S10   | 5.0               | 5.7                        | -                                | 5.0                |
| Ni/MgAl <sub>2</sub> O <sub>4</sub> -S50   | 5.0               | 5.5                        | 2.8                              | 13.6               |
| Ni/MgAl <sub>2</sub> O <sub>4</sub> -S150  | 5.2               | 6.4                        | 2.9                              | 28.3               |
| Ni/MgAl <sub>2</sub> O <sub>4</sub> -S335* | 5.1               | 12.3                       | 2.8                              | 11.4               |

\*Weight losses obtained in the temperature range of 350 °C and 650 °C.

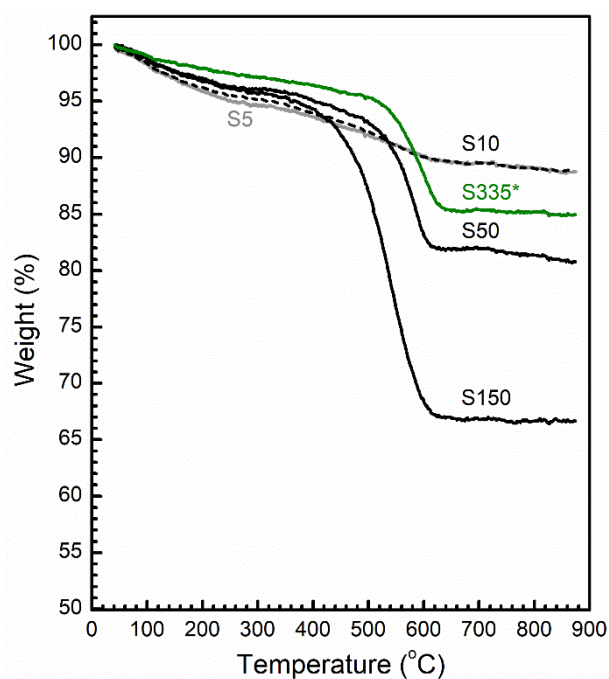

**Figure S3.** TG results for the spent Ni/MgAl<sub>2</sub>O<sub>4</sub>-E catalysts.

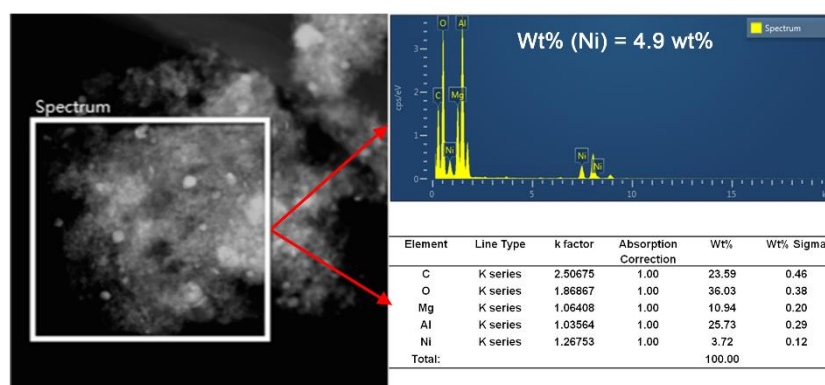

Figure S4. STEM-EDS images for the Ni/MgAl<sub>2</sub>O<sub>4</sub>-S335\* catalyst.
